# Supplementary material for: Deamidation Reactions of Asparagine- and Glutamine-Containing Dipeptides Investigated by Ion Spectroscopy
Source: PubMed Central journal article supplement (PMC5059420; doi:10.1007/s13361-016-1462-5), 2016-09-13
Supplement: 13361_2016_1462_MOESM1_ESM.pdf [file 13361_2016_1462_MOESM1_ESM.pdf]

# **Deamidation reactions of asparagine and glutamine containing dipeptides investigated by ion spectroscopy**

**Lisanne J.M. Kempkes<sup>1</sup>, Jonathan Martens<sup>1</sup>, Josipa Grzetic<sup>1</sup>, Giel Berden<sup>1</sup>, Jos Oomens<sup>1,2,\*</sup>**

*<sup>1</sup>Radboud University, Institute for Molecules and Materials, FELIX laboratory, Toernooiveld 7c, 6525 ED  
Nijmegen, The Netherlands*

*<sup>2</sup>Van 't Hoff Institute for Molecular Sciences, University of Amsterdam, Science Park 904, 1098 XH  
Amsterdam, the Netherlands*

## **Supporting Information**

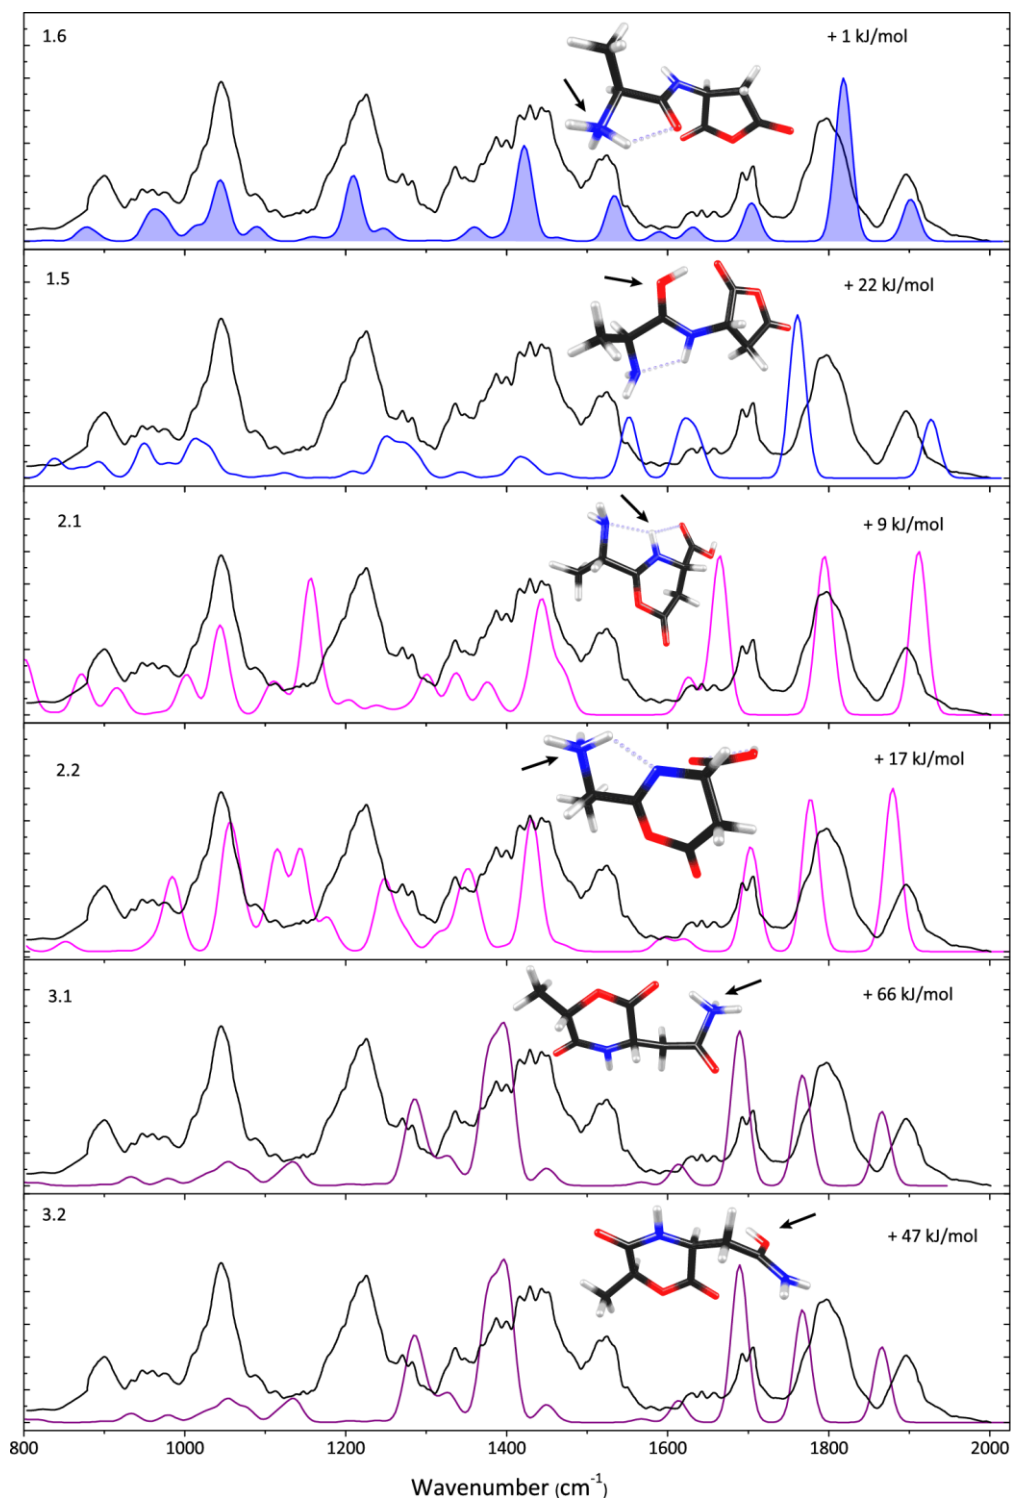

**Figure S1.** IRMPD spectrum of AN – 17 compared with the assigned structure calculation (shaded blue spectrum) and alternative structures from Table 1 having relative energies lower than 50 kJ/mol.

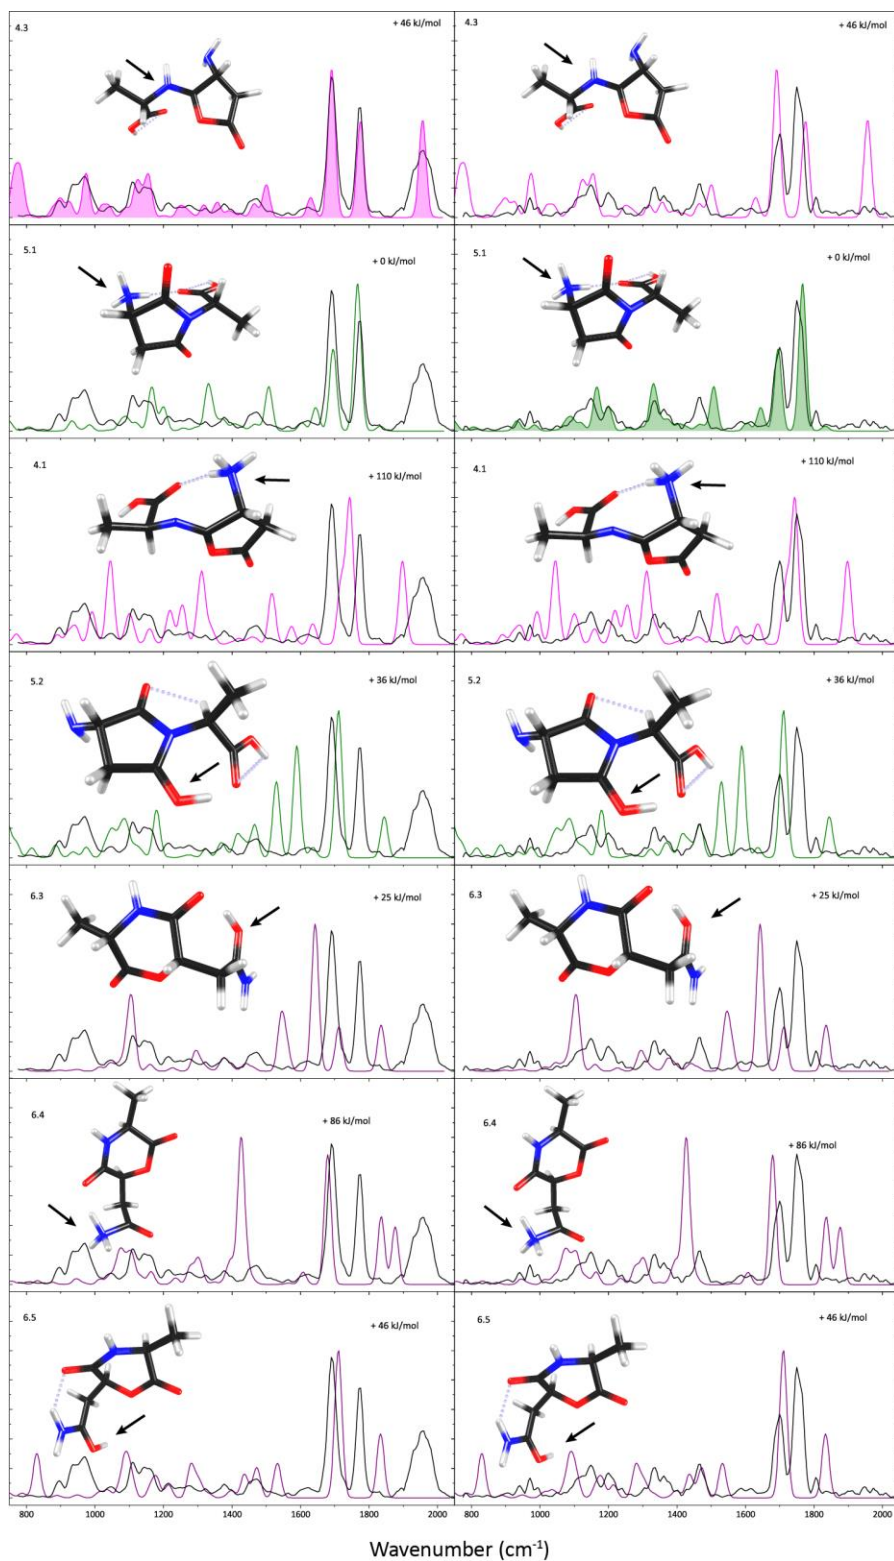

**Figure S2.** IRMPD spectra of NA – 17 compared with the computed spectra for alternative structures from Table 2.

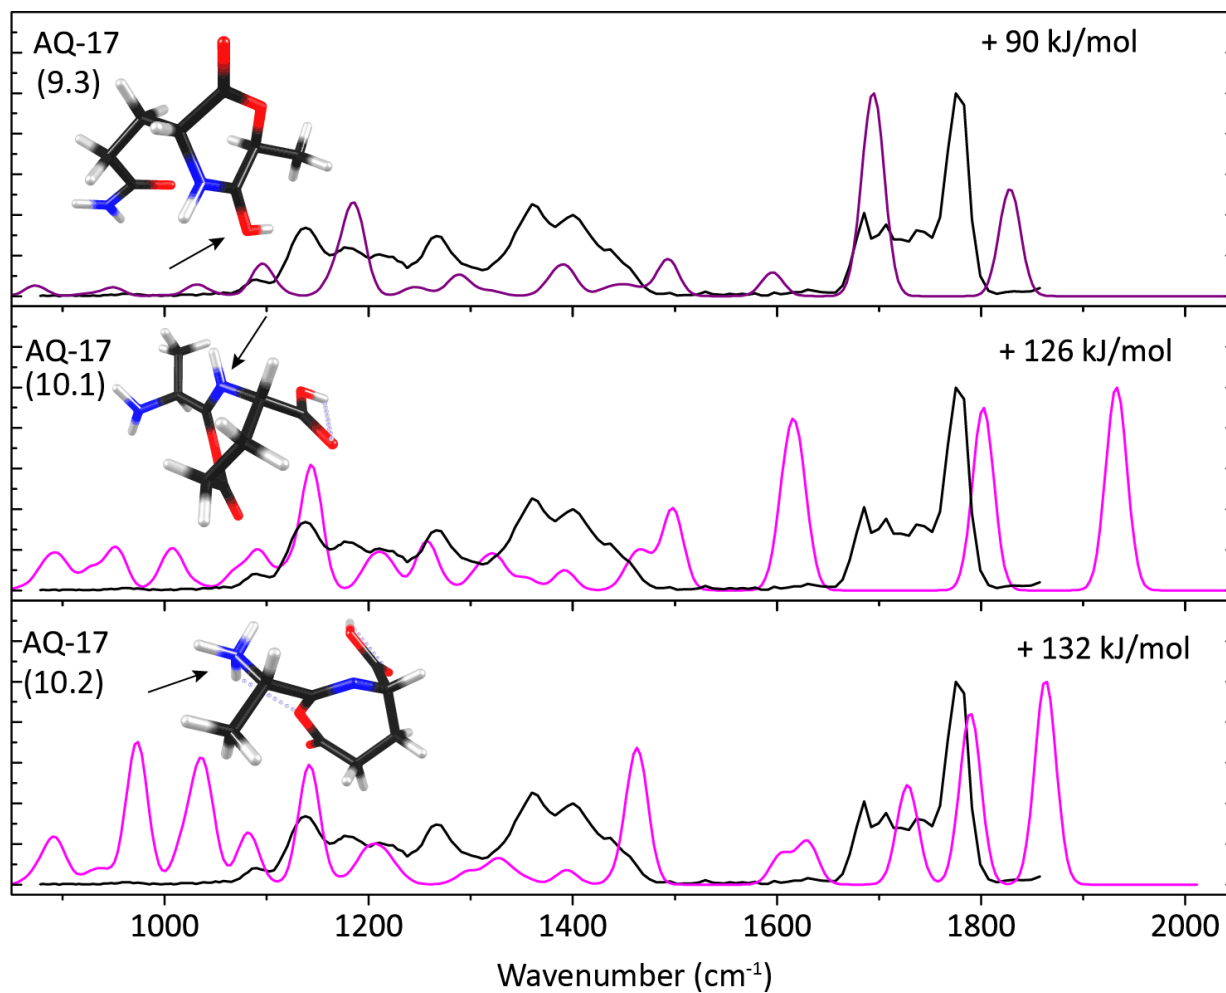

**Figure S3.** IRMPD spectrum of AQ-17 compared with the predicted spectrum of structure **9.3** (see Table 3) and with those of the previously suggested 7-membered ring structures **10.1** and **10.2**.

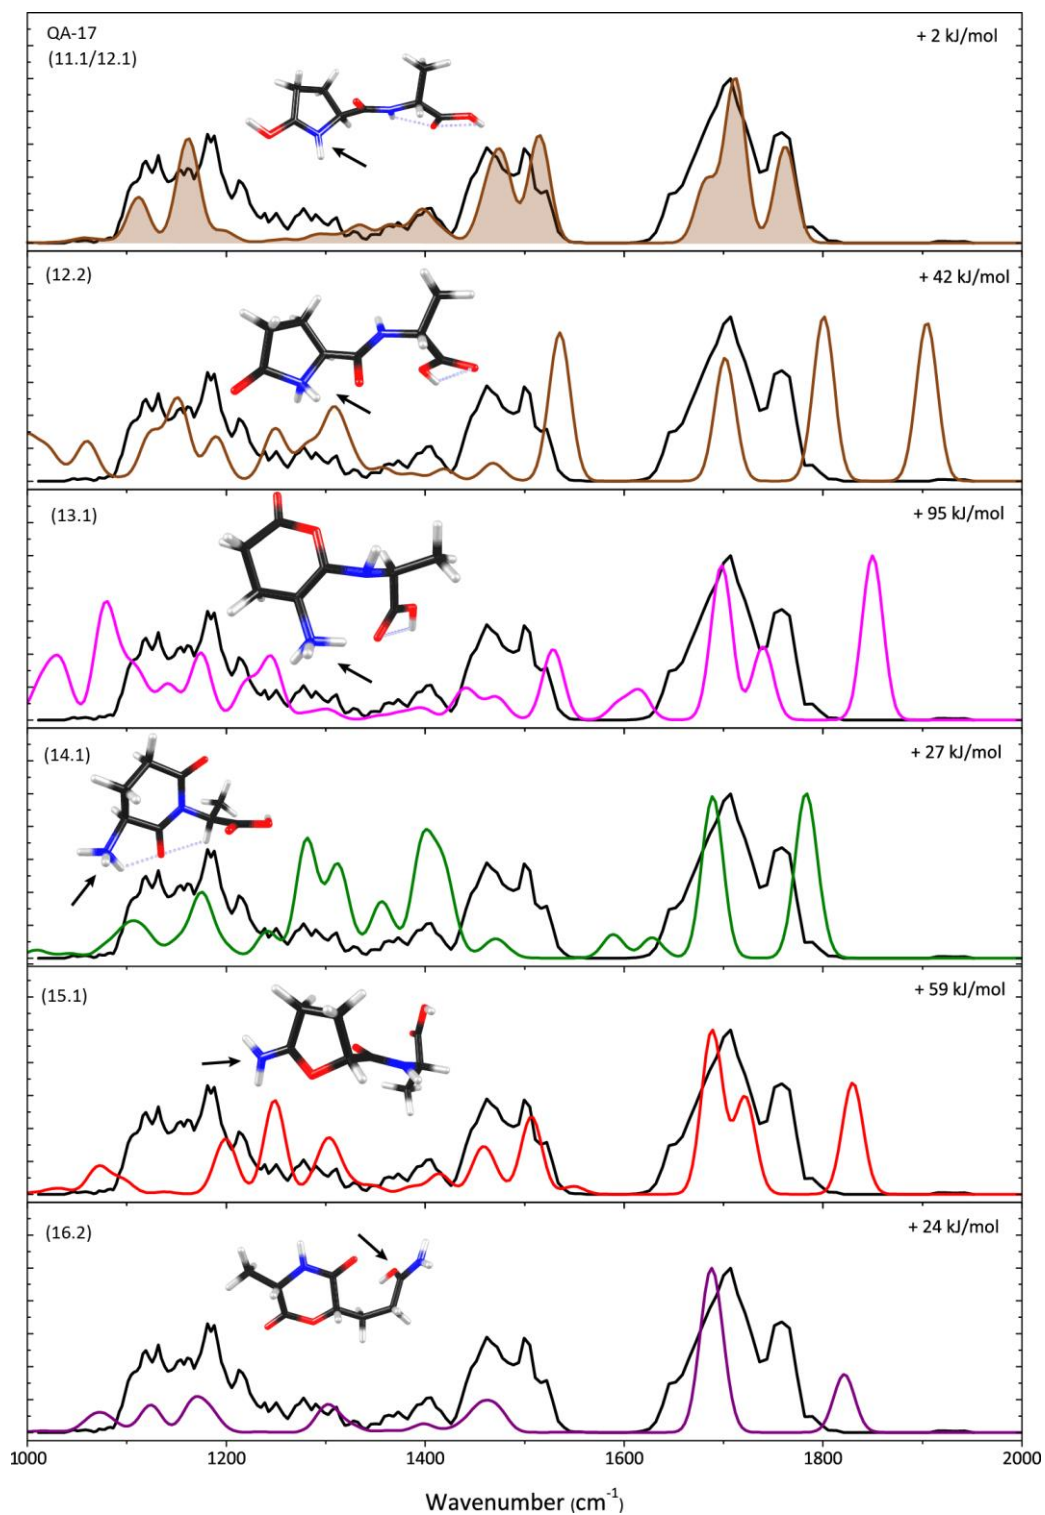

**Figure S4.** IRMPD spectrum of QA – 17 compared with the computed spectra for the assigned structure (shaded brown spectrum) and some alternative structures from Table 4.

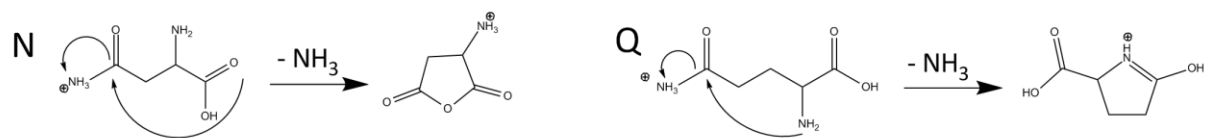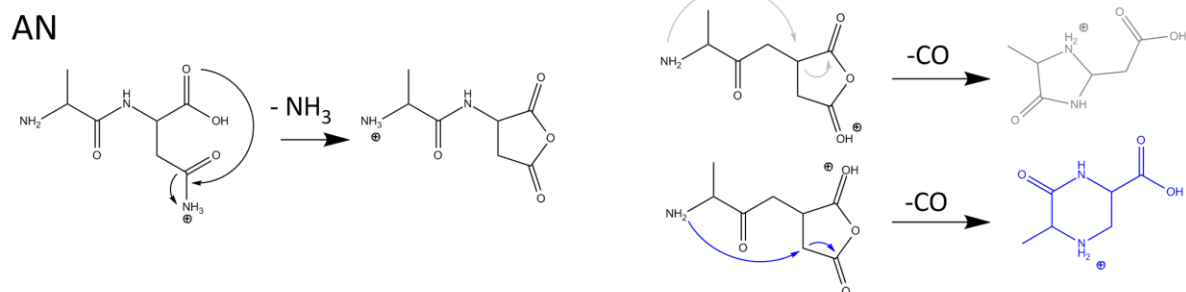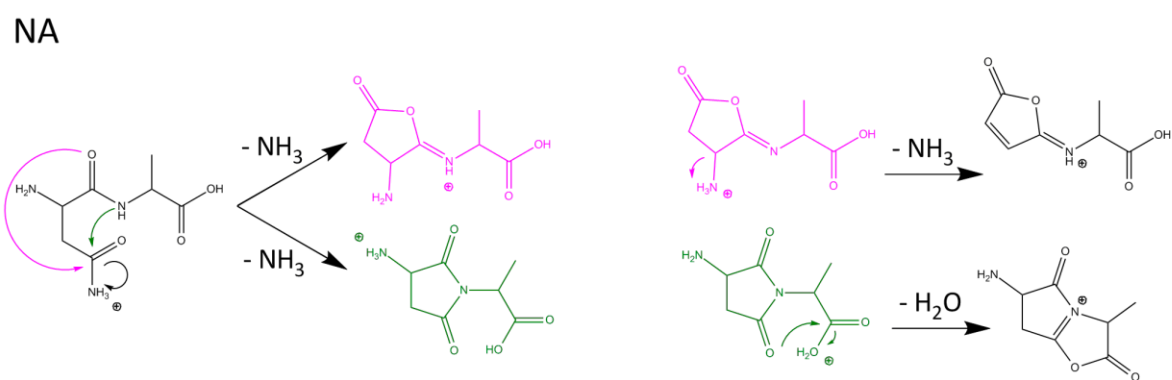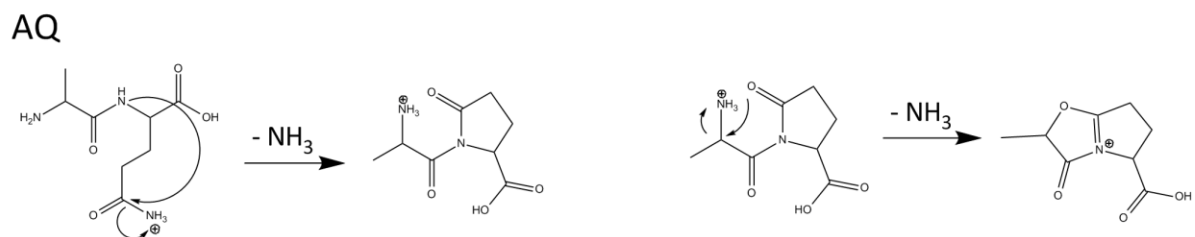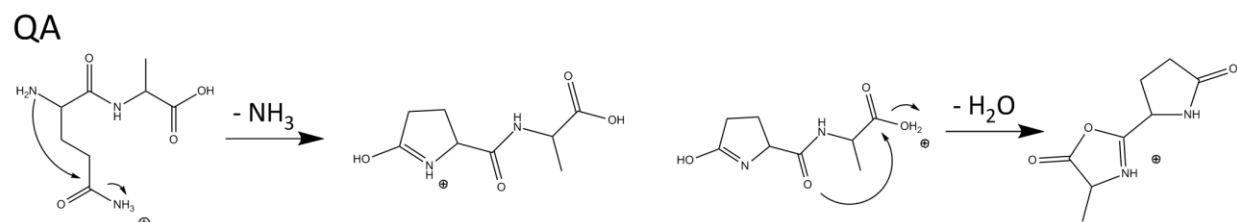

**Scheme S1:** Overview of identified  $MS^2$  and  $MS^3$  reaction pathways for protonated N and Q compared with those of the dipeptides AN, NA, AQ and QA.
